# Supplementary material for: Automated Avalanche Terrain Exposure Scale (ATES) mapping – Local validation and optimization in Western Canada
Source: Copernicus journal article supplement (doi:10.5194/nhess-2023-112), 2023-09-22
Supplement: Supplementary file [file nhess-2023-112-RC2-supplement.pdf]

### Line comments (non-exhaustive)

- Table 1: Why is some content in this table in bold font? 'events' appears to be underlined in blue (?)
- Figure 1: The location of the site in the inset is a bit hard to make out – maybe drop the black outline and chose a brighter fill colour for the polygon (and/or chose a smaller scale)
- Line 135: well\_defined
- Figure 3: In upper left, move 'b) Forest' to not be covered by dotted line; in lower left, b) ATES Map 3 → c) ATES Map 3
- Line 195: [...] ATESv2 (Table 1).
- Line 260ff: To keep things clear, I advise sticking to the specific terms (DTM and DSM) introduced in lines 120f, rather than the generic 'DEM', in lines 260ff and below (e.g. in Figure 6 figure caption)
- Line 287: [...] row of Figures 7 and 8
- Line 289: [...] terrain (Figures 7 & 8)
- Line 292: [...] causes
